# Supplementary material for: Highly transparent and self-healing films based on the dynamic Schiff base linkage
Source: Royal Society of Chemistry journal article supplement (doi:10.1039/c6ra23886f), 2016-01-01
Supplement: c6ra23886f1.pdf [file c6ra23886f1.pdf]

## Supporting Information

### Self-healing and Highly Transparent Films Based on Dynamic Schiff Base Linkage

Jiaoyu Ren, Yanxi Zhu, Hongyun Xuan, Xuefan Liu, Zhichao Lou and Liqin Ge \*

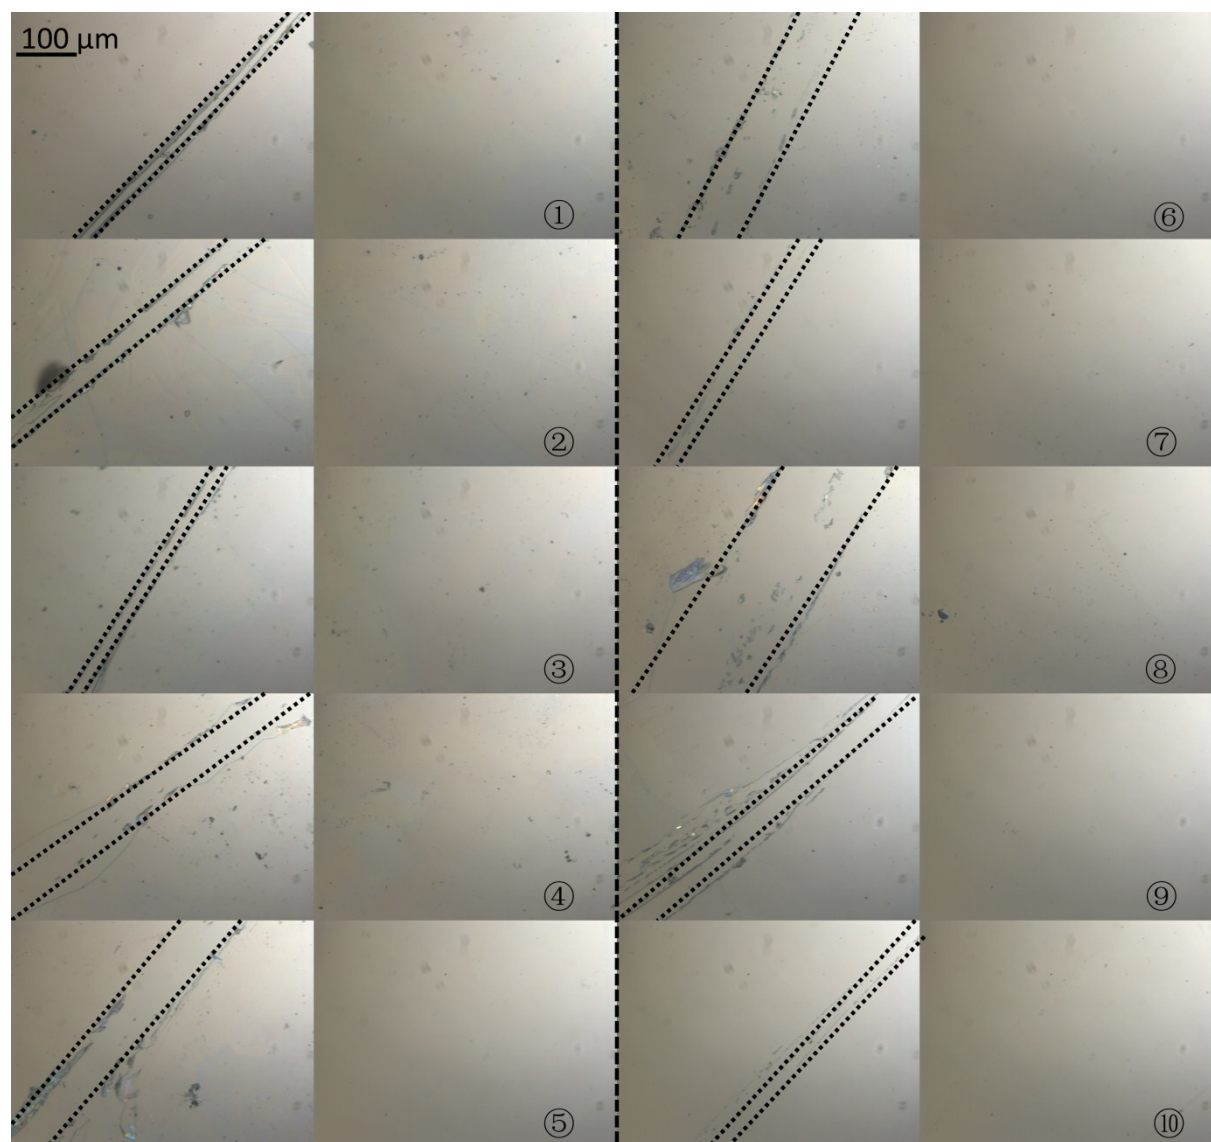

Figure S1. Ten cycles of damage/healing process

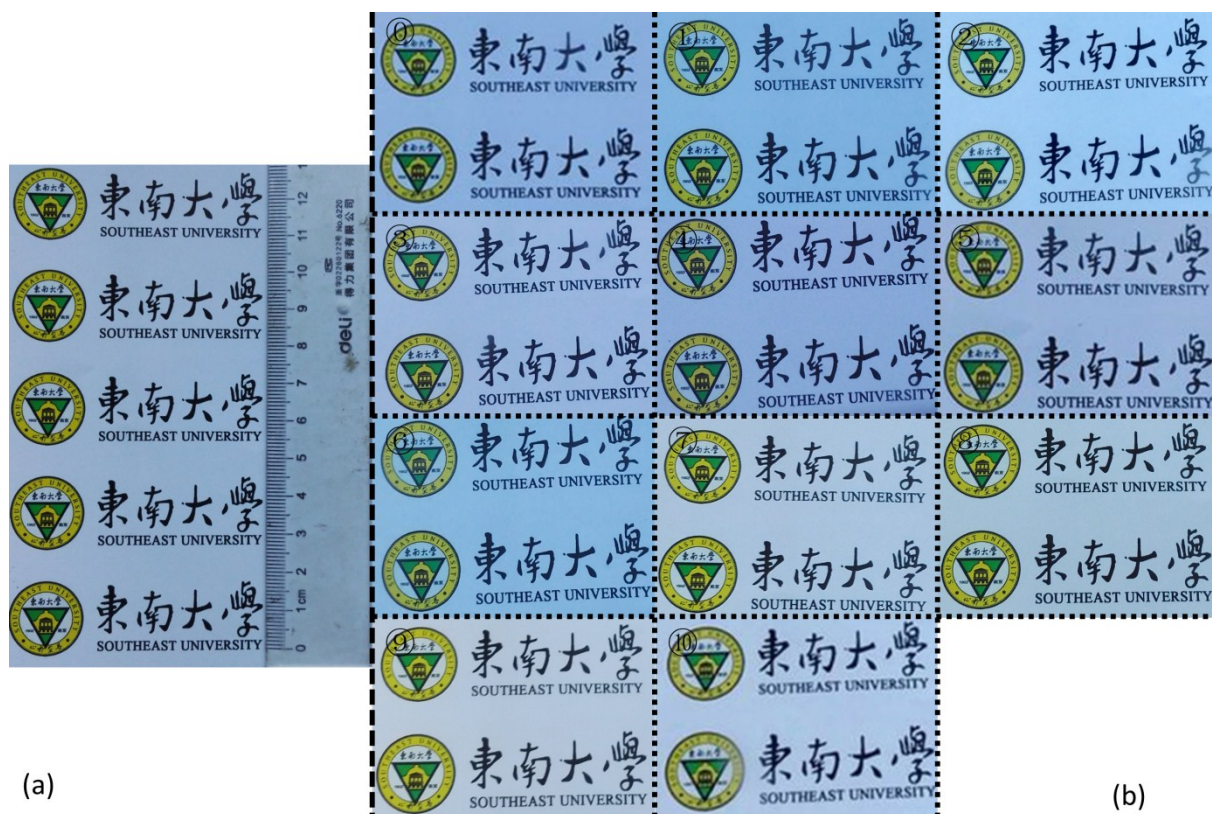

Figure S2. (a) Photograph of the picture; (b) the picture behind the prepared (CS/DF-PEG)<sub>15</sub> film (⊙) and the picture behind (CS/DF-PEG)<sub>15</sub> film healed different times (①-⑩).

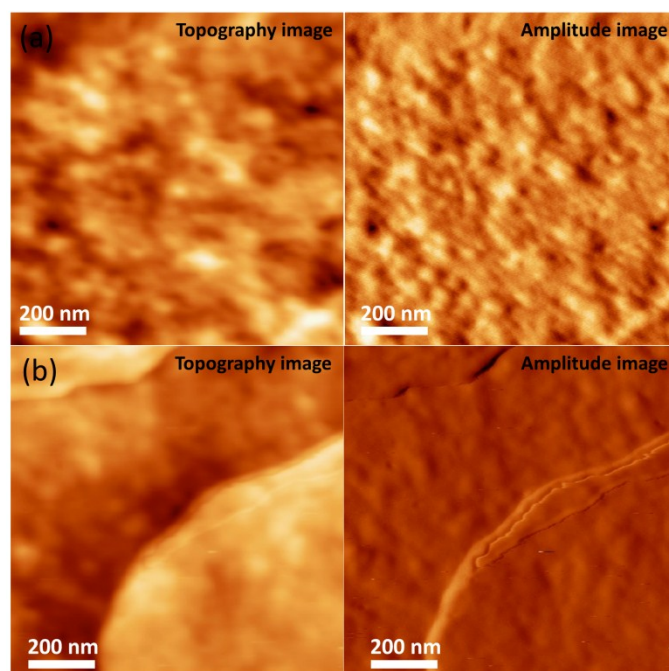

Figure S3. The AFM images of (a) the original (CS/DF-PEG)<sub>15</sub> film and (b) the healed (CS/DF-PEG)<sub>15</sub> film undergoing ten damage/healing processes.

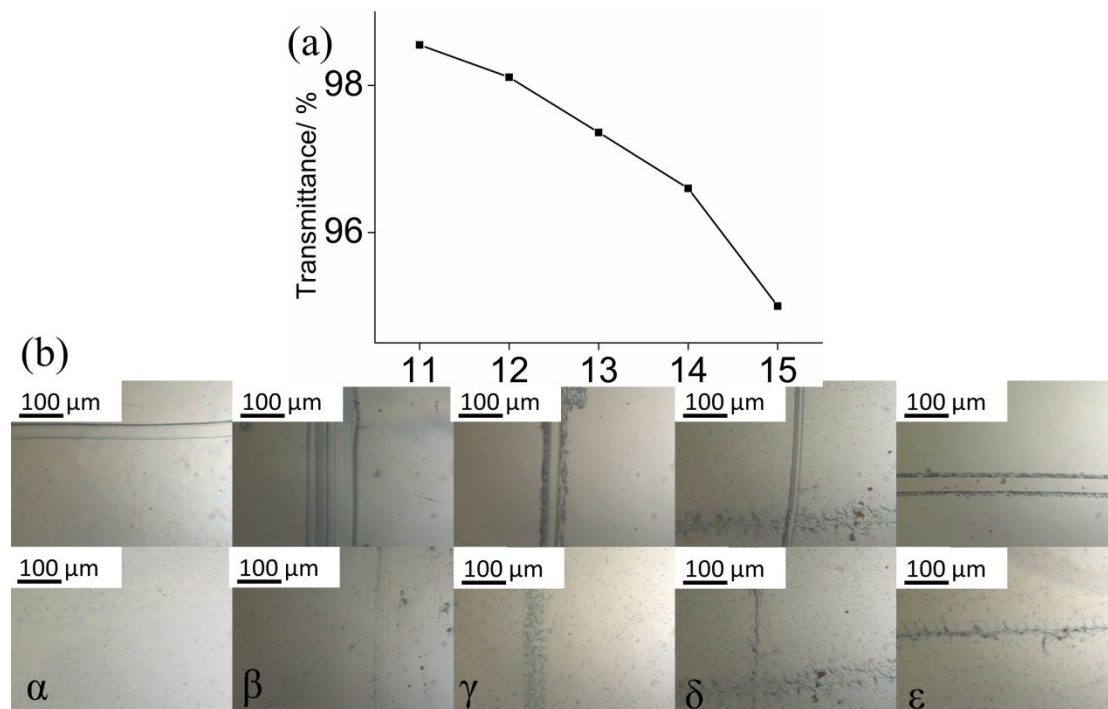

Figure S4. (a) Transparency property and (b) self-healing property of the (CS/DF-PEG)<sub>15</sub> film undergoing eleventh to fifteenth damage/healing process
